# Supplementary material for: Exon–intron boundary detection made easy by physicochemical properties of DNA
Source: Royal Society of Chemistry journal article supplement (doi:10.1039/d4mo00241e), 2025-03-11
Supplement: d4mo00241e1.xlsx [file d4mo00241e1.xlsx]

## Sheet: Trinucleotide Parameters
	X Displacement	Y Displacement	Inclination	Tip	Shear	Stretch	Stagger	Buckle	Propel	Opening	Alpha	Beta	Gamma	Delta	Epsilon	Zeta	Chi	Phase	Amplitude	Hydrogen bond	Stacking energy	Solvation
GCA	-0.188711	-0.0952573	3.22333	-1.29249	0.05	0.02	0.04	0.748	-4.749	0.903	-71.7132	167.078	56.0435	134.576	-158.082	-114.678	-100.704	151.817	39.526	0.49	0.38	-346.8
AAA	-0.570469	-0.231094	4.33561	4.23236	0.15	0.01	-0.02	4.748	-15.635	2.561	-72.1665	171.345	53.7214	136.633	-160.849	-108.865	-121.59	152.013	42.6611	0.93	0.56	-347.8
AAC	-0.985531	-0.176636	3.84136	1.11038	0.17	0.02	0.18	7.451	-15.554	1.772	-72.2776	155.99	52.1282	141.239	-171.811	-111.593	-95.2077	165.835	38.8806	0.57	0.1	-347.3
AAG	-0.569577	0.456495	2.17289	-0.443667	0.12	0	0.2	6.778	-16.59	3.074	-72.7277	165.768	56.5384	137.325	-164.411	-111.668	-111.597	154.336	41.9715	0.82	0.87	-353.5
AAT	-1.19456	-0.342934	-0.813231	-0.292982	0.16	0.03	0.14	2.38	-13.934	1.926	-72.5478	160.665	54.183	137.554	-173.38	-116.463	-92.9323	161.399	38.5933	1	0.29	-348
ACA	-0.871837	-0.746992	3.24832	-1.71275	0.02	0.05	0.03	-8.326	-2.805	1.619	-69.9008	170.832	55.2886	128.87	-156.188	-114.457	-114.282	139.962	42.6895	0.13	0.07	-351.6
ACC	-1.72927	-0.353131	3.80203	-0.492796	-0.02	0.03	-0.07	-10.947	-11.906	1.192	-69.6928	161.659	55.1589	134.122	-166.368	-116.947	-101.485	149.884	41.3189	0.86	0.49	-347.9
ACG	-0.953035	-0.65906	3.29834	-2.05999	0	0.04	0.07	-8.602	-5.675	1.564	-70.2765	171.279	55.4878	132.395	-159.97	-113.263	-113.859	143.823	44.3625	0.3	0.71	-349.7
ACT	-0.741833	-0.343432	1.18376	-2.25917	-0.01	0.01	0.18	-3.41	-12.932	0.923	-69.8517	171.485	60.4292	129.607	-172.595	-122.985	-92.7187	144.69	41.0761	0.01	0.48	-340.4
AGA	-0.716121	-0.0979872	-0.856197	4.07479	0.08	0.04	0.1	10.641	-7.812	1.13	-75.828	163.761	53.7464	140.034	-147.367	-106.349	-134.158	155.11	43.4221	0.15	0.74	-342
AGC	-1.67844	-0.01432	2.39886	3.61558	0.03	0	0.21	-2.06	-11.018	0.272	-74.0115	163.335	52.3548	140.798	-158.806	-108.861	-126.876	157.113	43.4178	0.27	0.24	-334.5
AGG	-1.07354	0.336816	4.22031	0.925156	0.06	0.03	0.27	10.531	-6.85	0.551	-80.2575	139.701	75.3356	139.002	-156.482	-121.919	-103.045	157.538	41.3492	0.03	1	-344.7
AGT	-0.925921	-0.432695	1.22316	3.03366	-0.01	0.01	0.18	-3.41	-12.932	0.923	-74.4908	178.659	53.2859	133.646	-174.707	-117.915	-96.7976	152.295	40.9027	0.01	0.48	-340.4
ATA	-1.31659	-0.448439	-1.01958	-2.24168	0.11	0.04	0.09	-7.199	-5.22	2.647	-71.0426	171.487	60.7801	131.954	-163.39	-115.457	-94.6216	145.27	42.2604	0.94	0.41	-355.8
ATC	-0.3685	-0.397511	3.68448	-2.77955	0.14	0.03	0.05	-2.528	-14.349	1.729	-67.9486	176.234	56.1642	130.118	-168.34	-114.18	-100.263	142.733	42.4808	0.25	0.1	-341.1
ATG	-1.32752	-0.181017	4.43567	-3.23293	0.12	0.02	0.03	-1.588	-14.484	2.233	-69.9543	170.672	57.0724	131.917	-154.538	-111.473	-112.471	143.5	42.7602	0.15	0.15	-355.7
ATT	-1.09448	-0.479191	4.64915	-0.254251	0.16	0.03	0.14	2.38	-13.934	1.926	-67.1297	177.307	56.5677	127.153	-173.638	-118.52	-94.2519	141.019	40.8848	1	0.29	-348
CAA	-0.184955	-0.311905	5.86466	4.57715	0.1	0.01	-0.04	8.302	-8.669	3.613	-76.5223	167.921	52.1397	140.632	-132.841	-98.7693	-165.833	151.851	44.9312	0.18	0.26	-351.5
CAC	-1.38944	0.334388	3.18572	1.44896	0.11	0.01	0.06	1.972	-10.956	2.378	-72.7666	163.023	52.3411	140.989	-168.799	-112.984	-103.017	163.883	39.782	0.07	0.25	-356.3
CAG	-1.21591	0.494173	5.84398	3.32513	0.1	0.02	0.1	3.89	-4.639	2.857	-75.76	169.239	52.229	138.809	-151.222	-102.069	-115.402	154.803	42.3243	0.03	0.2	-372.7
CAT	-1.00345	0.110475	3.92465	4.9238	0.12	0.02	0.03	-1.588	-14.484	2.233	-73.5718	162.967	53.142	139.941	-177.409	-116.102	-96.6605	166.184	38.0495	0.15	0.15	-355.7
CCA	-1.44011	-0.00640122	4.95351	0.293581	0	0.02	0.03	6.91	-3.042	1.037	-71.1972	172.998	54.4818	132.136	-157.671	-115.129	-106.9	146.562	41.0281	0.02	0.81	-348
CCC	-1.00988	0.465631	4.43672	1.36294	0.04	0.03	0.08	8.615	-4.807	0.466	-69.078	169.098	57.2045	131.983	-162.785	-115.233	-101.399	146.832	41.0822	1	0.97	-329.4
CCG	-0.93697	-0.199478	2.95569	-1.35222	0.03	0.02	0.16	7.006	-6.356	0.918	-73.2481	169.489	58.0131	130.42	-155.386	-116.564	-101.064	144.274	40.8002	0.85	0.14	-349.2
CCT	-0.768504	0.610906	5.01168	0.614685	0.06	0.03	0.27	10.531	-6.85	0.551	-69.1964	171.343	58.5318	128.06	-168.045	-114.128	-105.272	139.618	41.9583	0.03	1	-344.7
CGA	-0.286935	0.143374	3.80875	1.46034	0.02	0.03	0.01	7.199	-4.796	1.437	-76.9184	165.857	51.4225	141.648	-137.113	-98.2302	-158.262	155.626	43.7724	0.41	0.1	-351.3
CGC	-0.960232	0.140413	4.5645	1.70096	0.02	0.02	0.14	0.758	-5.253	0.617	-75.7083	168.734	50.1856	140.471	-144.306	-101.786	-143.872	155.177	43.972	0.98	1	-345.6
CGG	-0.929629	-0.225634	4.37105	1.70749	0.03	0.02	0.16	7.006	-6.356	0.918	-76.5015	166.159	52.6341	142.3	-151.437	-100.867	-125.838	161.076	41.7838	0.85	0.14	-349.2
CGT	-0.924222	-0.176848	4.33715	1.08845	0	0.04	0.07	-8.602	-5.675	1.564	-72.7519	170.985	53.1661	138.239	-165.616	-112.958	-110.209	160.116	40.0727	0.3	0.71	-349.7
CTA	-0.793992	-0.199667	7.62258	-1.76063	0.14	0.04	0.12	5.262	-8.449	3.275	-71.7767	174.408	54.4713	128.717	-158.791	-113.399	-117.928	137.993	43.3678	0.33	0.12	-356.8
CTC	-1.35433	-0.0504274	6.85368	0.747638	0.13	0.02	0.08	2.037	-11.432	2.895	-69.6683	178.519	54.4121	129.568	-169.07	-116.208	-103.462	142.488	41.9018	0.07	0.75	-348.9
CTG	-0.854995	0.0868684	7.09022	-3.62834	0.1	0.02	0.1	3.89	-4.639	2.857	-73.5118	161.541	66.676	132.792	-157.14	-118.344	-101.386	146.361	41.6295	0.03	0.2	-372.7
CTT	-0.911105	0.213119	3.9736	-1.67365	0.12	0	0.2	6.778	-16.59	3.074	-70.2797	173.73	59.9899	128.032	-171.627	-120.94	-94.2251	142.497	40.2754	0.82	0.87	-353.5
GAA	-0.768504	0.610906	5.01168	0.614685	0.14	0.02	-0.05	6.461	-13.772	2.952	-72.9556	166.667	52.7003	139.383	-161.551	-108.101	-110.014	160.394	40.281	–0.19	0.5	-347
GAC	-0.718455	0.266892	3.69729	0.69758	0.16	0.02	0.11	0.852	-13.817	1.308	-71.2785	164.782	52.0899	139.955	-174.081	-113.499	-97.8988	163.727	39.2948	0.09	0.01	-340.7
GAG	-1.00338	-0.0504852	5.94669	-2.07111	0.13	0.02	0.08	2.037	-11.432	2.895	-72.3879	168.763	53.1993	138.549	-163.6	-110.134	-100.987	157.864	40.9946	0.07	0.75	-348.9
GAT	-0.923484	0.235601	3.22107	2.04412	0.14	0.03	0.05	-2.528	-14.349	1.729	-71.3784	167.698	53.1413	137.698	-176.758	-118.541	-93.8125	163.407	38.1075	0.25	0.1	-341.1
GCC	-1.44853	-0.497097	4.79628	-1.46383	0.01	0.01	0.02	-5.883	-11.01	0.023	-69.4805	178.721	54.7404	135.647	-168.436	-117.714	-96.4401	154.688	39.7283	0.9	0.13	-341.8
GCG	-1.15492	0.274205	2.3011	-5.893	0.02	0.02	0.14	0.758	-5.253	0.617	-70.7147	157.327	54.2393	135.956	-157.988	-117.101	-103.093	153.115	40.2304	0.98	1	-345.6
GCT	-1.3695	-0.107204	4.35607	-1.68024	0.03	0	0.21	-2.06	-11.018	0.272	-70.7801	157.017	54.2658	136.596	-171.46	-122.633	-91.7155	156.129	39.3233	0.27	0.24	-334.5
GGA	-1.00988	0.465631	4.43672	1.36294	0.06	0.03	-0.05	7.583	-6.549	0.978	-75.6583	159.668	53.5304	140.354	-150.959	-110.203	-124.86	158.839	41.7776	0.85	0.66	-338.4
GGC	-1.20218	0.155933	5.63641	1.89373	0.01	0.01	0.02	-5.883	-11.01	0.023	-71.2758	179.04	50.6577	137.806	-172.141	-117.546	-98.737	158.43	40.9945	0.9	0.13	-341.8
GGG	-1.34205	0.117272	3.56258	0.226597	0.04	0.03	0.08	8.615	-4.807	0.466	-73.3188	156.872	51.818	140.697	-160.871	-112.901	-112.011	162.189	40.7495	1	0.97	-329.4
GGT	-1.29925	-0.327191	3.65095	3.55669	-0.02	0.03	-0.07	-10.947	-11.906	1.192	-69.0245	179.895	51.4411	133.434	-176.769	-123.319	-98.3263	152.701	40.7753	0.86	0.49	-347.9
GTA	-0.707375	-0.681934	4.18992	-0.680128	0.16	0.03	0.05	0.582	-7.203	2.297	-69.1464	176.686	55.2287	130.814	-158.25	-113.365	-114.338	142.555	41.9434	0.2	0.11	-347.2
GTC	-1.07354	0.336816	4.22031	0.925156	0.16	0.02	0.11	0.852	-13.817	1.308	-71.3111	173.103	55.0998	130.712	-169.125	-122.713	-92.7239	147.731	39.8022	0.09	0.01	-340.7
GTG	-1.44963	-0.286141	4.17987	-0.930549	0.11	0.01	0.06	1.972	-10.956	2.378	-69.7429	171.274	55.7965	134.035	-162.796	-111.184	-99.6586	148.456	41.5319	0.07	0.25	-356.3
GTT	-1.62744	-0.49741	4.01677	0.00932306	0.17	0.02	0.18	7.451	-15.554	1.772	-67.1755	-178.17	54.9955	130.342	-172.467	-117.71	-94.6186	146.657	39.5592	0.57	0.1	-347.3
TAA	-0.589134	0.197109	2.69251	3.43239	0.12	0.03	-0.03	3.807	-8.792	4.75	-73.8298	171.111	52.0967	136.75	-145.419	-99.0468	-127.484	148.899	44.3903	0.85	0.65	-348.8
TAC	-1.29704	-0.432512	4.65491	2.83196	0.16	0.03	0.05	0.582	-7.203	2.297	-73.0441	166.492	52.7296	138.507	-152.947	-107.756	-131.235	154.916	42.7421	0.2	0.11	-347.2
TAG	-0.956089	0.102204	2.25936	1.49532	0.14	0.04	0.12	5.262	-8.449	3.275	-72.9521	162.697	52.7568	140.027	-156.016	-105.704	-115.765	161.56	40.6057	0.33	0.12	-356.8
TAT	-1.19208	0.127353	5.52657	-0.911699	0.11	0.04	0.09	-7.199	-5.22	2.647	-72.2712	168.346	54.5995	134.119	-170	-114.047	-99.6487	155.626	39.4791	0.94	0.41	-355.8
TCA	-0.695573	-0.394994	4.74523	-0.636435	0.06	0.04	0.03	6.259	-2.92	1.541	-73.4782	165.453	60.507	128.27	-152.844	-113.189	-113.976	139.36	41.6302	0.18	0.23	-349
TCC	-0.570469	-0.231094	4.33561	4.23236	0.06	0.03	-0.05	7.583	-6.549	0.978	-69.2307	172.713	60.4034	126.6	-174.896	-118.753	-94.9465	140.635	39.9029	0.85	0.66	-338.4
TCG	-0.29416	-0.452399	2.84962	-4.60667	0.02	0.03	0.01	7.199	-4.796	1.437	-72.1592	166.472	61.7598	132.38	-156.665	-116.03	-98.1977	148.136	39.7214	0.41	0.1	-351.3
TCT	-0.978713	0.257154	7.17642	-2.89024	0.08	0.04	0.1	10.641	-7.812	1.13	-69.7703	169.912	57.109	128.886	-168.433	-115.868	-95.3939	143.243	40.7871	0.15	0.74	-342
TGA	-0.471213	-0.37868	4.42747	2.89651	0.06	0.04	0.03	6.259	-2.92	1.541	-75.8627	168.056	52.5752	140.277	-129.356	-95.8422	-173.332	151.387	45.3107	0.18	0.23	-349
TGC	-0.749616	0.024899	6.93385	2.01893	0.05	0.02	0.04	0.748	-4.749	0.903	-73.8183	166.822	51.4044	139.344	-137.781	-102.833	-162.103	150.068	46.226	0.49	0.38	-346.8
TGG	-0.995199	0.388761	4.70929	-0.823521	0	0.02	0.03	6.91	-3.042	1.037	-74.5965	166.553	51.9993	140.44	-147.988	-102.553	-130.097	157.843	42.4547	0.02	0.81	-348
TGT	-0.625204	0.0574846	1.78608	-1.33558	0.02	0.05	0.03	-8.326	-2.805	1.619	-73.0721	172.791	50.4368	134.313	-154.298	-110.164	-133.043	148.374	43.4859	0.13	0.07	-351.6
TTA	-0.152528	-0.180896	5.06629	-2.50793	0.12	0.03	-0.03	3.807	-8.792	4.75	-70.8265	170.786	56.0427	130.308	-147.709	-106.37	-135.485	138.646	43.4379	0.85	0.65	-348.8
TTC	-0.718455	0.266892	3.69729	0.69758	0.14	0.02	-0.05	6.461	-13.772	2.952	-69.0488	177.681	55.4995	133.491	-169.028	-113.939	-104.855	148.077	41.6589	0.19	0.5	-347
TTG	-0.671531	-0.288568	6.8809	-4.91903	0.1	0.01	-0.04	8.302	-8.669	3.613	-69.0259	172.575	56.7019	124.136	-161.496	-113.217	-98.2162	133.37	40.8911	0.18	0.26	-351.5
TTT	-1.34205	0.117272	3.56258	0.226597	0.15	0.01	-0.02	4.748	-15.635	2.561	-71.4683	175.577	53.1121	132.174	-162.427	-115.755	-103.001	146.782	41.5455	0.93	0.56	-347.8

## Sheet: Tetranucleotide Parameters
	Shift	Slide	Rise	Tilt	Roll	Twist
AAAA	-0.23	-0.46	3.37	-1.567	0.95	34.924
AAAG	-0.05	-0.36	3.26	-2.832	-0.126	35.789
GAAA	-0.14	-0.44	3.32	-1.32	1.707	33.634
GAAG	-0.13	-0.34	3.26	-2.823	1.114	34.132
CAAA	-0.49	-0.12	3.25	-2.291	0.238	34.897
CAAG	-0.68	0.03	3.26	-3.886	1.032	36.612
TAAA	-0.41	-0.11	3.33	-2.758	2.397	34.795
TAAG	-0.33	-0.31	3.23	-3.265	-0.513	32.511
AAAC	-0.35	-0.45	3.34	-2.893	0.121	37.151
AAAT	-0.28	-0.48	3.38	-2.35	0.232	37.681
GAAC	-0.12	-0.45	3.29	-2.411	0.428	35.066
GAAT	-0.3	-0.44	3.37	-2.703	-0.132	37.168
CAAC	-0.75	0.05	3.3	-3.867	-0.085	38.013
CAAT	-0.65	-0.14	3.32	-4.091	0.658	37.269
TAAC	-1.03	0.17	3.24	-4.138	0.374	36.994
TAAT	-0.94	0	3.33	-4.088	1.207	37.915
AAGA	0.13	-0.55	3.42	-0.814	4.048	33.176
AAGG	-0.11	-0.82	3.42	-1.928	2.249	33.947
GAGA	0.19	-0.45	3.3	-1.183	3.776	31.431
GAGG	-0.13	-0.52	3.26	-2.366	3.419	32.036
CAGA	-0.17	-0.36	3.27	-2.271	3.82	31.717
CAGG	-0.2	-0.48	3.2	-2.876	0.415	30.727
TAGA	-0.11	-0.37	3.28	-1.681	2.724	32.282
TAGG	-0.28	-0.29	3.18	-2.675	1.491	32.635
AAGC	-0.3	-0.76	3.46	-2.526	2.171	35.604
AAGT	-0.26	-1	3.53	-1.285	1.936	36.782
GAGC	-0.16	-0.74	3.36	-2.413	1.585	31.56
GAGT	-0.19	-0.81	3.46	-2.498	2.354	35.054
CAGC	-0.42	-0.38	3.23	-2.938	2.024	32.4
CAGT	-0.67	-0.34	3.35	-3.556	0.824	36.904
TAGC	-0.73	-0.4	3.36	-4.314	3.711	35.636
TAGT	-0.83	-0.34	3.39	-4.34	3.484	35.853
AGAA	-0.19	-0.21	3.46	0.794	1.261	37.517
AGAG	-0.34	-0.02	3.39	-1.043	1.111	37.695
GGAA	-0.18	-0.13	3.36	0	2.288	36.32
GGAG	-0.08	-0.16	3.3	-1.13	1.217	35.937
CGAA	-0.54	0.09	3.38	-1.257	2.552	36.142
CGAG	-0.65	0.23	3.31	-2.488	1.454	37.139
TGAA	-0.64	0.04	3.32	-1.635	2.594	34.388
TGAG	-0.62	0.16	3.33	-2.292	1.365	36.888
AGAC	-0.35	-0.17	3.41	-0.718	0.5	38.923
AGAT	-0.34	-0.34	3.52	-0.499	0.806	39.651
GGAC	-0.66	-0.06	3.28	-3.632	1.276	37.625
GGAT	-0.42	-0.19	3.44	-1.558	0.837	39.022
CGAC	-0.83	0.26	3.36	-2.876	1.418	37.994
CGAT	-0.58	-0.05	3.43	-1.765	0.439	38.902
TGAC	-0.94	0.18	3.32	-3.887	1.646	37.124
TGAT	-0.65	0.06	3.37	-2.678	1.081	38.545
AGGA	0.05	-0.62	3.56	2.634	3.793	35.737
AGGG	0.11	-0.38	3.4	1.046	3.236	34.279
GGGA	0.33	-0.43	3.44	1.79	4.849	33.14
GGGG	-0.12	-0.58	3.45	0.051	4.018	34.732
CGGA	-0.01	-0.09	3.39	0.595	3.453	33.871
CGGG	-0.32	-0.22	3.42	-0.308	2.852	35.432
TGGA	-0.27	-0.24	3.35	-0.405	4.736	32.393
TGGG	-0.38	-0.1	3.31	-1.055	2.304	34.785
AGGC	-0.17	-0.92	3.64	0.863	3.739	37.397
AGGT	-0.06	-1.11	3.68	1.522	4.766	36.348
GGGC	-0.34	-0.53	3.47	-0.61	3.85	34.703
GGGT	-0.02	-0.93	3.65	0.135	3.541	37.037
CGGC	-0.53	-0.08	3.37	-1.272	2.424	35.874
CGGT	-0.56	-0.29	3.49	-1.529	3.333	36.36
TGGC	-0.51	-0.24	3.41	-1.329	2.909	35.419
TGGT	-0.39	-0.4	3.51	-1.244	3.563	36.767
AGTA	0.45	-0.55	3.37	2.215	-1.969	34.34
AGTG	0.06	-0.85	3.45	2.293	-1.378	33.395
GGTA	0.25	-0.53	3.31	1.505	-0.768	33.294
GGTG	0.05	-0.53	3.29	0.477	-2.122	32.996
CGTA	-0.2	-0.37	3.23	0.573	-0.558	30.139
CGTG	-0.39	-0.47	3.2	-0.218	0.272	29.416
TGTA	-0.64	-0.42	3.17	-0.101	0.091	30.084
TGTG	-0.53	-0.53	3.24	0.183	-1.486	31.107
AGTC	-0.05	-0.84	3.43	2.018	-1.463	33.213
AGTT	0.02	-0.86	3.49	1.891	-1.186	34.61
GGTC	-0.22	-0.76	3.41	0.873	-0.681	33.156
GGTT	-0.19	-0.76	3.37	-0.68	-1.197	33.271
CGTC	-0.4	-0.66	3.4	0.024	-1.677	32.678
CGTT	-0.31	-0.79	3.44	0.251	-1.081	32.941
TGTC	-0.58	-0.52	3.24	-0.303	-0.091	30.228
TGTT	-0.46	-0.62	3.35	0.111	-1.437	33.085
ATGA	0.55	0.04	3.26	2.631	6.739	35.274
ATGG	0.36	0.08	3.22	1.575	5.272	36.451
GTGA	0.97	0.09	3.21	3.795	7.693	33.122
GTGG	0.53	0.01	3.01	1.083	6.797	29.737
CTGA	0.16	0.03	3.02	1.357	7.559	28.895
CTGG	0.04	0.04	3.08	0.078	6.029	32.218
TTGA	0.32	0.04	3.06	0.28	8.54	28.842
TTGG	0.05	-0.05	3.05	-1.355	8.056	28.782
ATGC	0.78	-0.03	3.39	2.039	6.328	37.194
ATGT	0.81	-0.14	3.45	1.647	5.435	38.458
GTGC	0.7	-0.03	3.24	2.289	6.186	34.459
GTGT	0.58	-0.06	3.35	1.228	6.47	36.129
CTGC	0.31	0.02	3.19	0.374	6.033	33.917
CTGT	0.18	-0.05	3.18	0.325	6.787	33.516
TTGC	-0.04	-0.08	3.14	-1.633	8.125	30.106
TTGT	0.24	-0.06	3.32	-1.439	7.126	34.126
AATA	0.18	-0.85	3.3	0.511	-2.426	32.071
AATG	0.12	-0.9	3.34	0.614	-2.403	31.937
GATA	0.22	-0.84	3.26	0.469	-1.873	30.35
GATG	0.16	-0.78	3.28	0.257	-1.588	30.719
CATG	-0.02	-0.7	3.17	-0.184	-0.174	28.454
TATA	-0.15	-0.75	3.22	-0.199	-0.578	29.617
TATG	0	-0.66	3.16	-0.03	0.233	28.636
AATT	-0.02	-0.95	3.39	0.108	-2.452	32.613
GATC	-0.04	-0.8	3.28	-0.243	-1.921	31.247
GATT	-0.05	-0.89	3.32	-0.397	-2.28	31.788
AGCG	0.2	-0.55	3.5	0.459	-1.087	36.674
GGCA	0.43	-0.58	3.44	1.503	-0.188	35.163
GGCG	0.37	-0.37	3.4	0.097	-0.388	35.917
CGCA	0.12	-0.16	3.41	0.425	-2.113	35.968
CGCG	-0.04	-0.32	3.37	0.356	-1.21	32.001
TGCA	-0.28	-0.26	3.37	-1.1	-0.782	34.544
AGCT	-0.14	-0.69	3.56	-0.072	-0.326	37.371
GGCC	-0.07	-0.72	3.48	-0.985	-0.593	36.502
GGCT	0.08	-0.8	3.56	-0.787	-0.856	37.594
TGCT	-0.57	-0.42	3.42	-2.67	-0.137	35.174
ATAA	0.73	0.09	3.29	3.197	5.931	35.559
GTAA	0.88	0.1	3.2	3.433	6.551	34.135
CTAG	-0.13	0.13	3	-0.212	5.788	31.544
TTAA	-0.52	0.12	3.13	0.161	8.556	31.315
TTAG	-0.66	0.2	3.09	-2.582	6.012	32.483
ATAC	0.17	0.07	3.27	0.268	4.324	37.504
ATAT	0.06	-0.25	3.54	-0.384	4.655	40.28
GTAC	-0.31	-0.06	3.15	-0.182	5.93	32.323
CTAC	-0.83	0.08	3.17	-2.352	5.869	34.436
CTAT	-0.28	0.1	3.26	-1.187	4.967	36.108
ACGA	0.43	0.11	3.32	3.599	6.706	36.181
ACGG	0.33	0.18	3.21	1.351	5.648	34.94
GCGA	0.26	0.15	3.17	1.809	5.924	33.341
GCGG	-0.07	0.19	3.16	0.072	4.812	35.375
CCGA	0.02	0.05	3.03	1.074	6.755	29.951
CCGG	-0.09	0.11	2.88	-0.308	5.343	28.397
TCGA	0.1	0.09	3.08	0.323	7.42	29.786
ACGC	-0.19	0.14	3.32	-0.486	4.887	37.97
ACGT	0.35	0.02	3.49	1.344	5.819	40.785
GCGC	0.29	0.11	3.23	1.842	5.351	35.702
TTTT	-0.23	-0.46	3.37	-1.567	0.95	34.924
CTTT	-0.05	-0.36	3.26	-2.832	-0.126	35.789
TTTC	-0.14	-0.44	3.32	-1.32	1.707	33.634
CTTC	-0.13	-0.34	3.26	-2.823	1.114	34.132
TTTG	-0.49	-0.12	3.25	-2.291	0.238	34.897
CTTG	-0.68	0.03	3.26	-3.886	1.032	36.612
TTTA	-0.41	-0.11	3.33	-2.758	2.397	34.795
CTTA	-0.33	-0.31	3.23	-3.265	-0.513	32.511
GTTT	-0.35	-0.45	3.34	-2.893	0.121	37.151
ATTT	-0.28	-0.48	3.38	-2.35	0.232	37.681
GTTC	-0.12	-0.45	3.29	-2.411	0.428	35.066
ATTC	-0.3	-0.44	3.37	-2.703	-0.132	37.168
GTTG	-0.75	0.05	3.3	-3.867	-0.085	38.013
ATTG	-0.65	-0.14	3.32	-4.091	0.658	37.269
GTTA	-1.03	0.17	3.24	-4.138	0.374	36.994
ATTA	-0.94	0	3.33	-4.088	1.207	37.915
TCTT	0.13	-0.55	3.42	-0.814	4.048	33.176
CCTT	-0.11	-0.82	3.42	-1.928	2.249	33.947
TCTC	0.19	-0.45	3.3	-1.183	3.776	31.431
CCTC	-0.13	-0.52	3.26	-2.366	3.419	32.036
TCTG	-0.17	-0.36	3.27	-2.271	3.82	31.717
CCTG	-0.2	-0.48	3.2	-2.876	0.415	30.727
TCTA	-0.11	-0.37	3.28	-1.681	2.724	32.282
CCTA	-0.28	-0.29	3.18	-2.675	1.491	32.635
GCTT	-0.3	-0.76	3.46	-2.526	2.171	35.604
ACTT	-0.26	-1	3.53	-1.285	1.936	36.782
GCTC	-0.16	-0.74	3.36	-2.413	1.585	31.56
ACTC	-0.19	-0.81	3.46	-2.498	2.354	35.054
GCTG	-0.42	-0.38	3.23	-2.938	2.024	32.4
ACTG	-0.67	-0.34	3.35	-3.556	0.824	36.904
GCTA	-0.73	-0.4	3.36	-4.314	3.711	35.636
ACTA	-0.83	-0.34	3.39	-4.34	3.484	35.853
TTCT	-0.19	-0.21	3.46	0.794	1.261	37.517
CTCT	-0.34	-0.02	3.39	-1.043	1.111	37.695
TTCC	-0.18	-0.13	3.36	0	2.288	36.32
CTCC	-0.08	-0.16	3.3	-1.13	1.217	35.937
TTCG	-0.54	0.09	3.38	-1.257	2.552	36.142
CTCG	-0.65	0.23	3.31	-2.488	1.454	37.139
TTCA	-0.64	0.04	3.32	-1.635	2.594	34.388
CTCA	-0.62	0.16	3.33	-2.292	1.365	36.888
GTCT	-0.35	-0.17	3.41	-0.718	0.5	38.923
ATCT	-0.34	-0.34	3.52	-0.499	0.806	39.651
GTCC	-0.66	-0.06	3.28	-3.632	1.276	37.625
ATCC	-0.42	-0.19	3.44	-1.558	0.837	39.022
GTCG	-0.83	0.26	3.36	-2.876	1.418	37.994
ATCG	-0.58	-0.05	3.43	-1.765	0.439	38.902
GTCA	-0.94	0.18	3.32	-3.887	1.646	37.124
ATCA	-0.65	0.06	3.37	-2.678	1.081	38.545
TCCT	0.05	-0.62	3.56	2.634	3.793	35.737
CCCT	0.11	-0.38	3.4	1.046	3.236	34.279
TCCC	0.33	-0.43	3.44	1.79	4.849	33.14
CCCC	-0.12	-0.58	3.45	0.051	4.018	34.732
TCCG	-0.01	-0.09	3.39	0.595	3.453	33.871
CCCG	-0.32	-0.22	3.42	-0.308	2.852	35.432
TCCA	-0.27	-0.24	3.35	-0.405	4.736	32.393
CCCA	-0.38	-0.1	3.31	-1.055	2.304	34.785
GCCT	-0.17	-0.92	3.64	0.863	3.739	37.397
ACCT	-0.06	-1.11	3.68	1.522	4.766	36.348
GCCC	-0.34	-0.53	3.47	-0.61	3.85	34.703
ACCC	-0.02	-0.93	3.65	0.135	3.541	37.037
GCCG	-0.53	-0.08	3.37	-1.272	2.424	35.874
ACCG	-0.56	-0.29	3.49	-1.529	3.333	36.36
GCCA	-0.51	-0.24	3.41	-1.329	2.909	35.419
ACCA	-0.39	-0.4	3.51	-1.244	3.563	36.767
TACT	0.45	-0.55	3.37	2.215	-1.969	34.34
CACT	0.06	-0.85	3.45	2.293	-1.378	33.395
TACC	0.25	-0.53	3.31	1.505	-0.768	33.294
CACC	0.05	-0.53	3.29	0.477	-2.122	32.996
TACG	-0.2	-0.37	3.23	0.573	-0.558	30.139
CACG	-0.39	-0.47	3.2	-0.218	0.272	29.416
TACA	-0.64	-0.42	3.17	-0.101	0.091	30.084
CACA	-0.53	-0.53	3.24	0.183	-1.486	31.107
GACT	-0.05	-0.84	3.43	2.018	-1.463	33.213
AACT	0.02	-0.86	3.49	1.891	-1.186	34.61
GACC	-0.22	-0.76	3.41	0.873	-0.681	33.156
AACC	-0.19	-0.76	3.37	-0.68	-1.197	33.271
GACG	-0.4	-0.66	3.4	0.024	-1.677	32.678
AACG	-0.31	-0.79	3.44	0.251	-1.081	32.941
GACA	-0.58	-0.52	3.24	-0.303	-0.091	30.228
AACA	-0.46	-0.62	3.35	0.111	-1.437	33.085
TCAT	0.55	0.04	3.26	2.631	6.739	35.274
CCAT	0.36	0.08	3.22	1.575	5.272	36.451
TCAC	0.97	0.09	3.21	3.795	7.693	33.122
CCAC	0.53	0.01	3.01	1.083	6.797	29.737
TCAG	0.16	0.03	3.02	1.357	7.559	28.895
CCAG	0.04	0.04	3.08	0.078	6.029	32.218
TCAA	0.32	0.04	3.06	0.28	8.54	28.842
CCAA	0.05	-0.05	3.05	-1.355	8.056	28.782
GCAT	0.78	-0.03	3.39	2.039	6.328	37.194
ACAT	0.81	-0.14	3.45	1.647	5.435	38.458
GCAC	0.7	-0.03	3.24	2.289	6.186	34.459
ACAC	0.58	-0.06	3.35	1.228	6.47	36.129
GCAG	0.31	0.02	3.19	0.374	6.033	33.917
ACAG	0.18	-0.05	3.18	0.325	6.787	33.516
GCAA	-0.04	-0.08	3.14	-1.633	8.125	30.106
ACAA	0.24	-0.06	3.32	-1.439	7.126	34.126
TATT	0.18	-0.85	3.3	0.511	-2.426	32.071
CATT	0.12	-0.9	3.34	0.614	-2.403	31.937
TATC	0.22	-0.84	3.26	0.469	-1.873	30.35
CATC	0.16	-0.78	3.28	0.257	-1.588	30.719
CATA	0	-0.66	3.16	-0.03	0.233	28.636
AATC	-0.05	-0.89	3.32	-0.397	-2.28	31.788
CGCT	0.2	-0.55	3.5	0.459	-1.087	36.674
TGCC	0.43	-0.58	3.44	1.503	-0.188	35.163
CGCC	0.37	-0.37	3.4	0.097	-0.388	35.917
TGCG	0.12	-0.16	3.41	0.425	-2.113	35.968
AGCC	0.08	-0.8	3.56	-0.787	-0.856	37.594
AGCA	-0.57	-0.42	3.42	-2.67	-0.137	35.174
TTAT	0.73	0.09	3.29	3.197	5.931	35.559
TTAC	0.88	0.1	3.2	3.433	6.551	34.135
CTAA	-0.66	0.2	3.09	-2.582	6.012	32.483
GTAT	0.17	0.07	3.27	0.268	4.324	37.504
GTAG	-0.83	0.08	3.17	-2.352	5.869	34.436
ATAG	-0.28	0.1	3.26	-1.187	4.967	36.108
TCGT	0.43	0.11	3.32	3.599	6.706	36.181
CCGT	0.33	0.18	3.21	1.351	5.648	34.94
TCGC	0.26	0.15	3.17	1.809	5.924	33.341
CCGC	-0.07	0.19	3.16	0.072	4.812	35.375
TCGG	0.02	0.05	3.03	1.074	6.755	29.951
GCGT	-0.19	0.14	3.32	-0.486	4.887	37.97
